# Supplementary material
Source: MDPI journal article supplement (https://www.mdpi.com/2411-5150/7/1/20)
Supplement: s1 [file s1]

Siddiqui F et al.  
Supplemental Figures

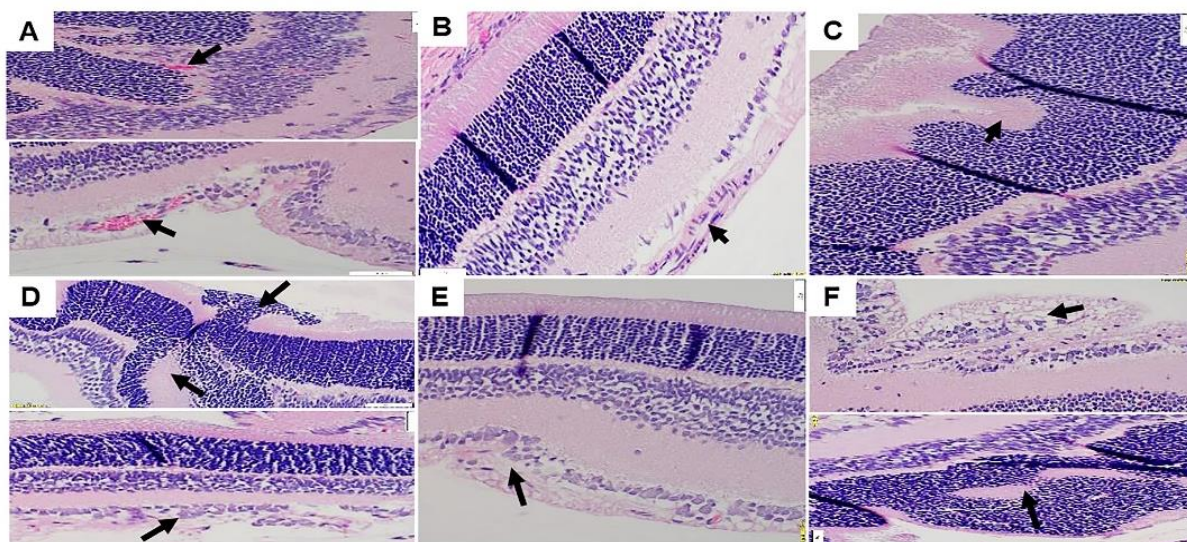

**Figure S1.** Representative H&E stained images of retinas from 21-day old rat exposed to 50/12% O<sub>2</sub> intermittent hypoxia (IH, panels A-C), and 21/12% O<sub>2</sub> IH (panels D-E). Animals were supplemented with olive oil (OO, panels A and D), coenzyme Q10 (CoQ10, panels B and E), or fish oil (panels C and F). Images are 40X magnification and the scale bar is 20 μM. Arrows show hemorrhage, and major abnormalities in the retinal layers.

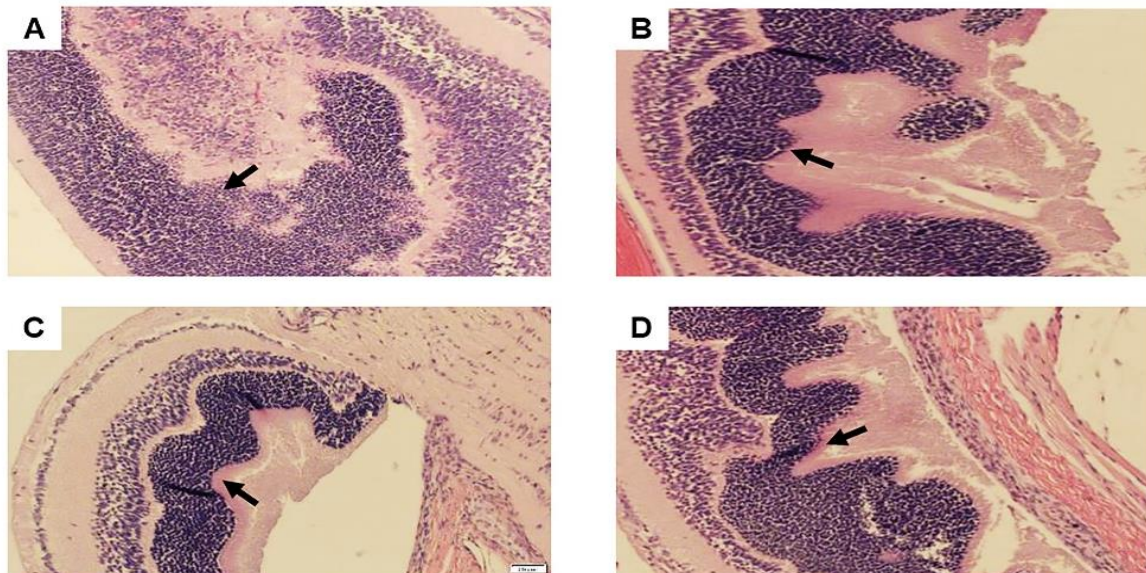

**Figure S2.** Representative H&E stained images of retinas from untreated 21-day old rat exposed to 50/12% O<sub>2</sub> intermittent hypoxia (IH) at P14 (panel A) 21/12% O<sub>2</sub> at P14 (panel B), 50/12% O<sub>2</sub> at P21 (panel C), and 21/12% O<sub>2</sub> at P21 (panel D). Images are 40X magnification and the scale bar is 20 μM. Arrows show major abnormalities in the retinal layers in both IH groups.

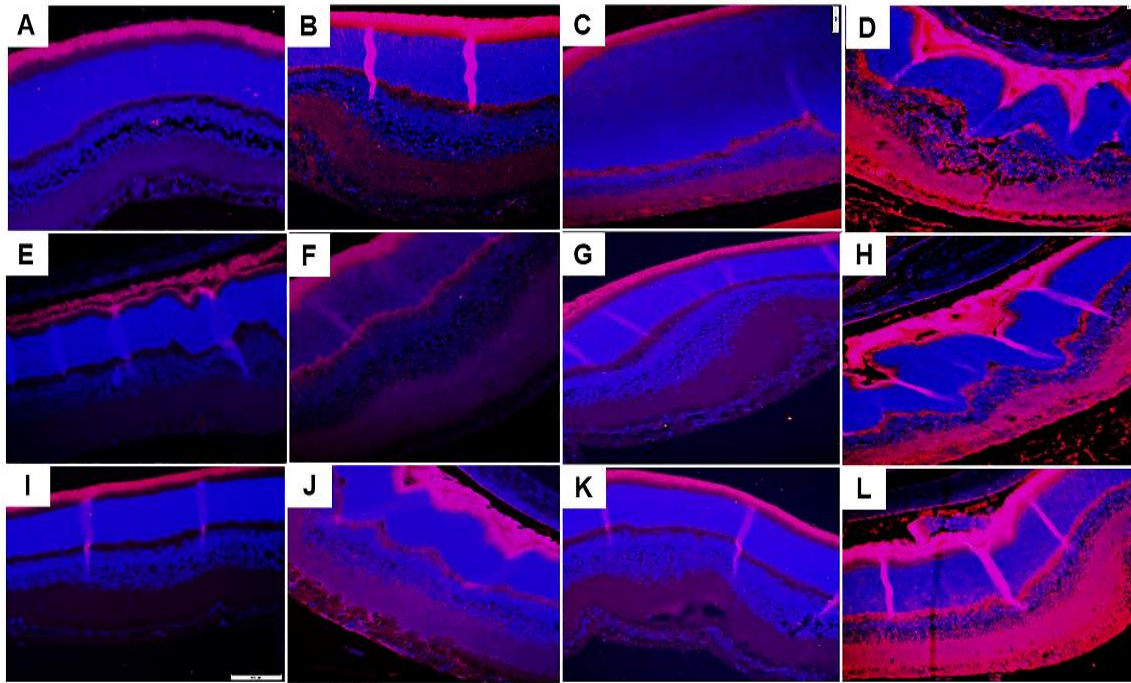

**Figure S3.** Representative image showing immunoreactivity of hypoxia inducible factor (HIF)<sub>1α</sub> (panels A, B, E, F, I, J) and vascular endothelial growth factor (VEGF, panels C, D, G, H, K, L) in the retinal sections from groups supplemented with CoQ10 in RA (panels A and C, respectively), 50/12% O<sub>2</sub> IH (panels E and G, respectively), and 21/12% O<sub>2</sub> IH (panels I and K, respectively); or fish oil in RA (panels B and D, respectively), 50/12% O<sub>2</sub> IH (panels F and H, respectively), and 21/12% O<sub>2</sub> IH (panels I and K, respectively). CoQ10 decreased HIF<sub>1α</sub> in RA (panel A), 50/12% O<sub>2</sub> IH (panel E), and 21/12% O<sub>2</sub> IH (panel I), and VEGF in RA (panel C), 50/12% O<sub>2</sub> IH (panel G), and 21/12% O<sub>2</sub> IH (panel K) compared to fish oil. Corresponding quantitative analysis is presented in Table 1. Images are 40X magnification (scale=20 μM).

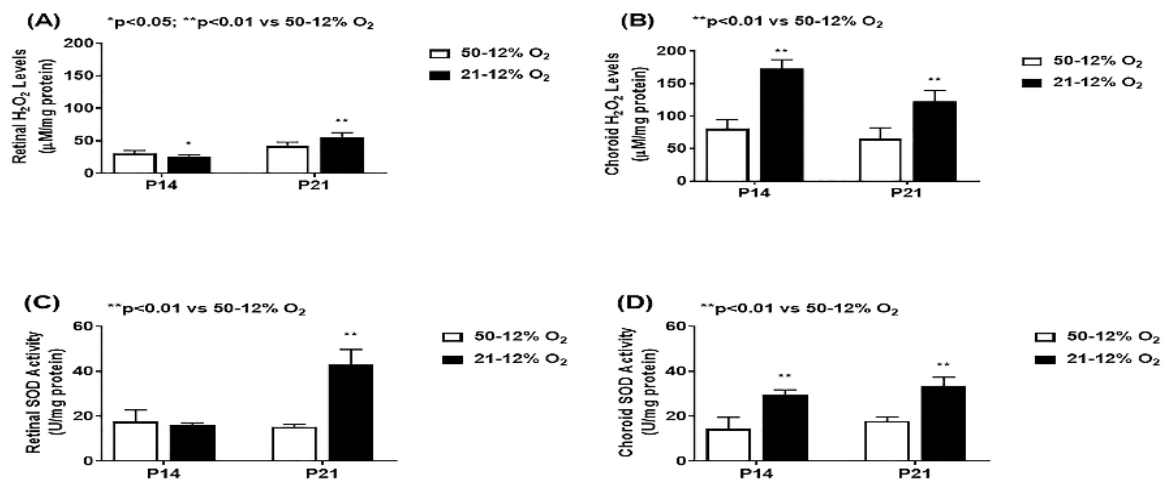

**Figure S4.** Effects of neonatal IH on retinal (panels A and C) and choroid-RPE (panels B and D) hydrogen peroxide (H<sub>2</sub>O<sub>2</sub>) and superoxide dismutase (SOD) levels in untreated neonatal rats on postnatal day 14 (P14) and P21. The white panel represents the animals exposed to 50/12% O<sub>2</sub> IH and the black panel represents the animals exposed to 21/12% O<sub>2</sub> IH. In the retina, H<sub>2</sub>O<sub>2</sub> (panel A)

and SOD (panel C) levels were higher with 21/12% O<sub>2</sub> IH at P21. In the choroid-RPE, H<sub>2</sub>O<sub>2</sub> (panel B) and SOD (panel D) were higher at P14 and P21. Data are expressed as mean  $\pm$  SEM.  $n = 6$  samples/group.

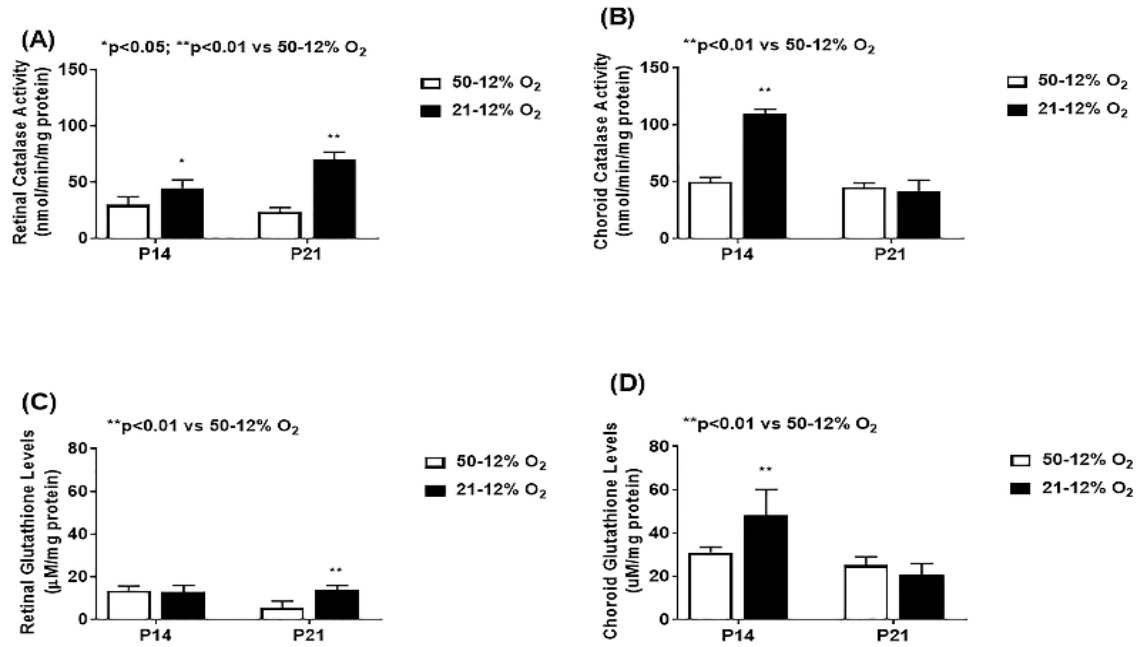

**Figure S5.** Effects of neonatal IH on retinal (panels A and C) and choroid-RPE (panels B and D) catalase and glutathione levels in untreated neonatal rats on postnatal day 14 (P14) and P21. The white panel represents the animals exposed to 50/12% O<sub>2</sub> IH and the black panel represents the animals exposed to 21/12% O<sub>2</sub> IH. In the retina, catalase levels (panel A) were higher with 21/12% O<sub>2</sub> IH at P14 and P21, while glutathione was increased at P21 (panel C). In the choroid-RPE, catalase (panel B) and glutathione (panel D) levels were higher at P14 only. Data are expressed as mean  $\pm$  SEM.  $n = 6$  samples/group.
